# Supplementary material
Source: PubMed Central journal article supplement (PMC3993020)
Supplement: Supp_Fig2.pdf [file Supp_Fig2.pdf]

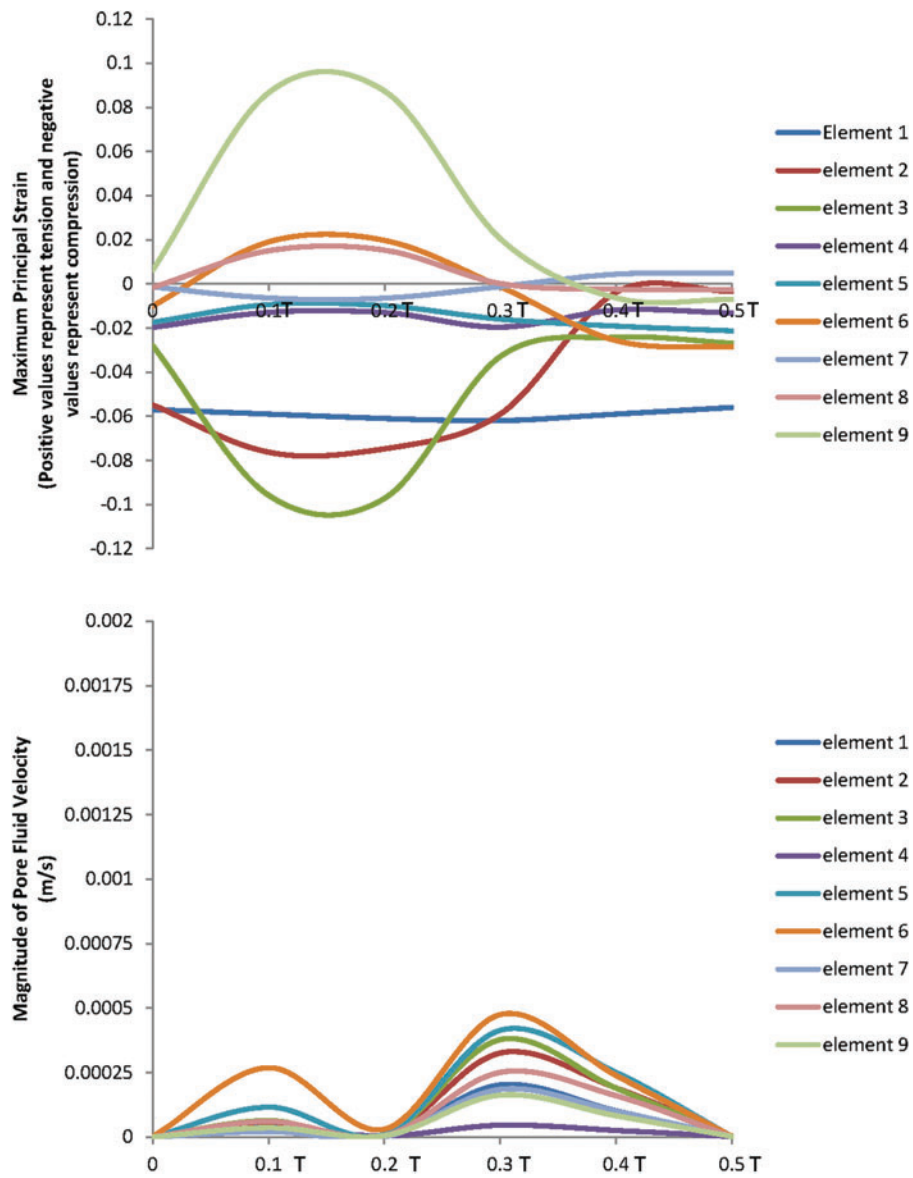

**SUPPLEMENTARY FIG. S2.** Changes of the maximum principal strain and the pore fluid velocity at nine locations within the scaffolds cross section during the loading cycle in the dynamic interfacial shear alone group (regimen ii). ( $T$  is the period of the loading cycle.)
